# Supplementary material for: Plasma C24:0 ceramide impairs adipose tissue remodeling and promotes liver steatosis and glucose imbalance in offspring of rats
Source: PubMed Central journal article supplement — Heliyon. 2024 Oct 11;10(20):e39206. doi: 10.1016/j.heliyon.2024.e39206 (PMC11620212; doi:10.1016/j.heliyon.2024.e39206), 2024-10-11

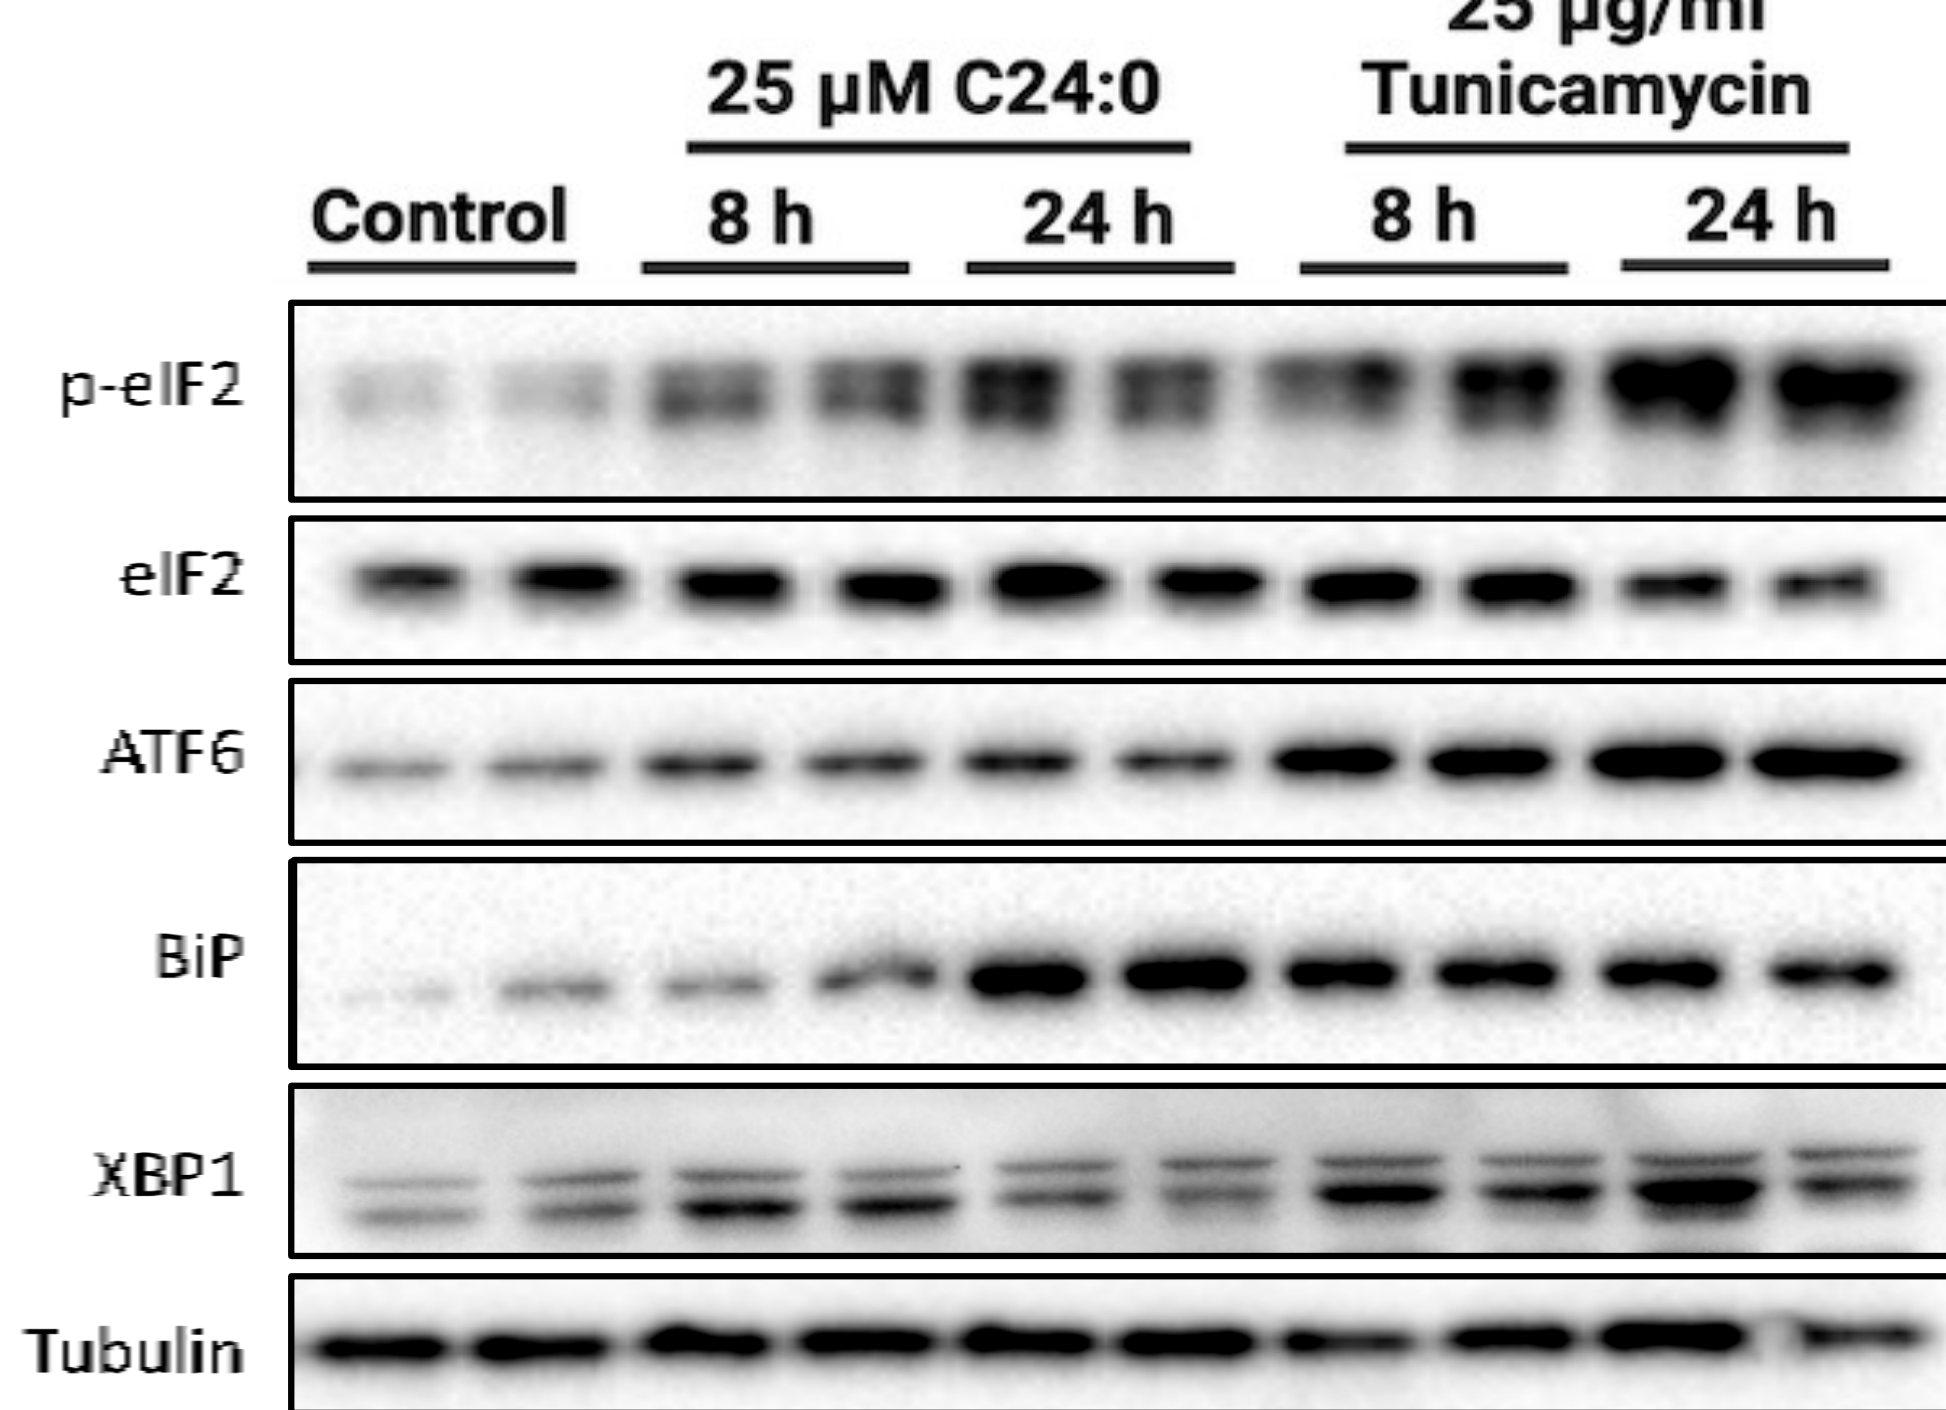

# p-eIF2

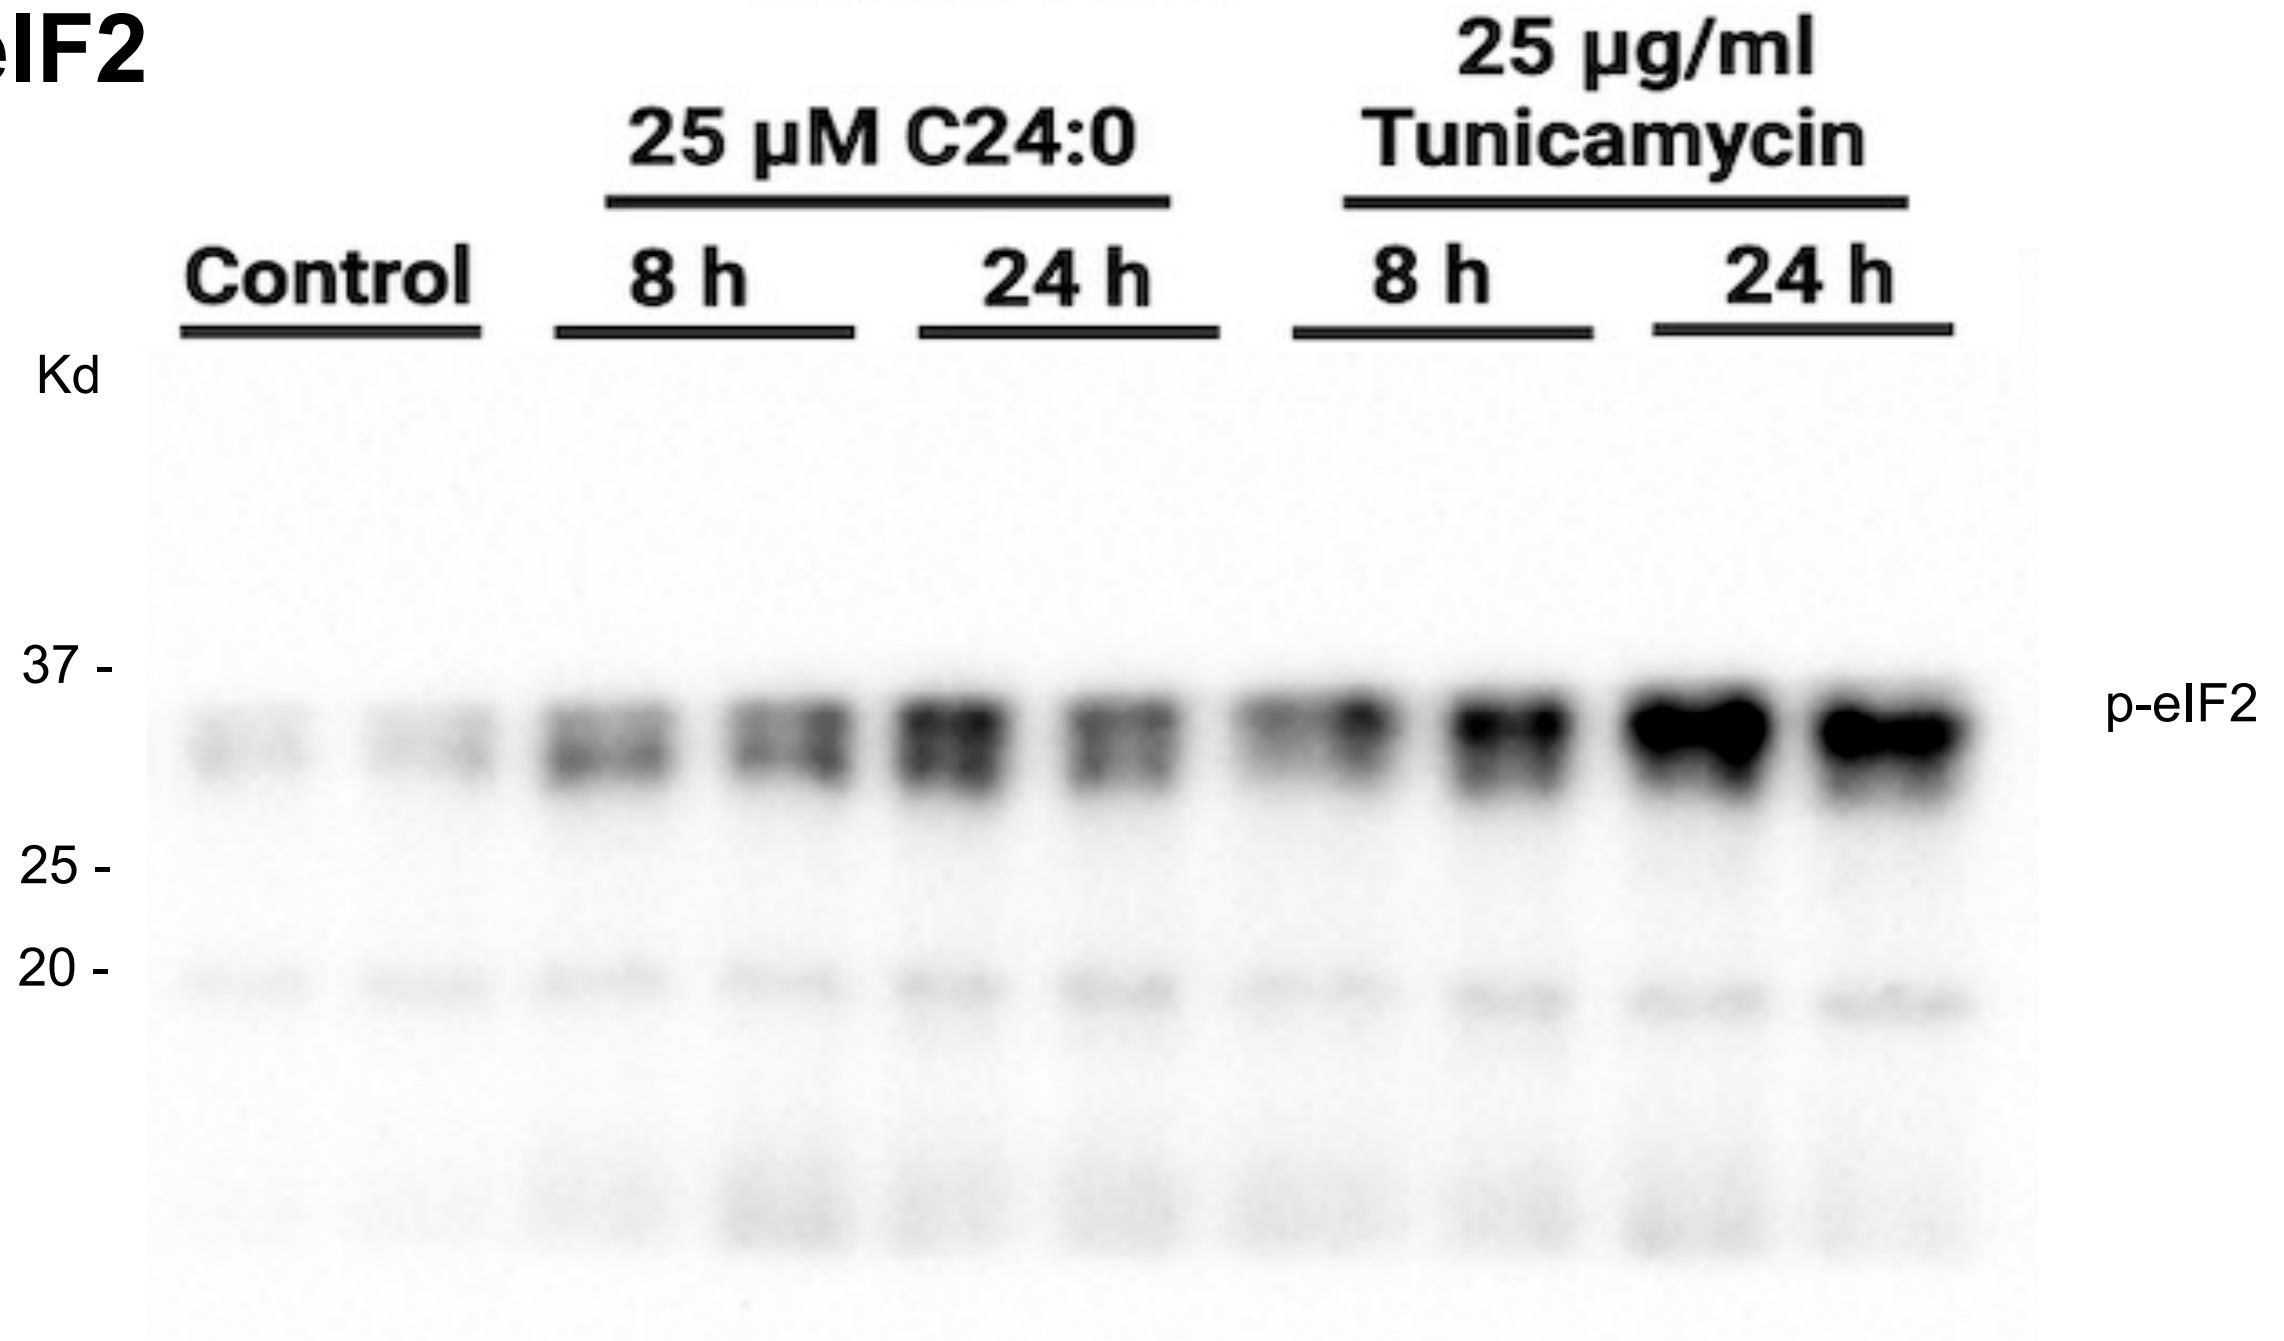

# eIF2

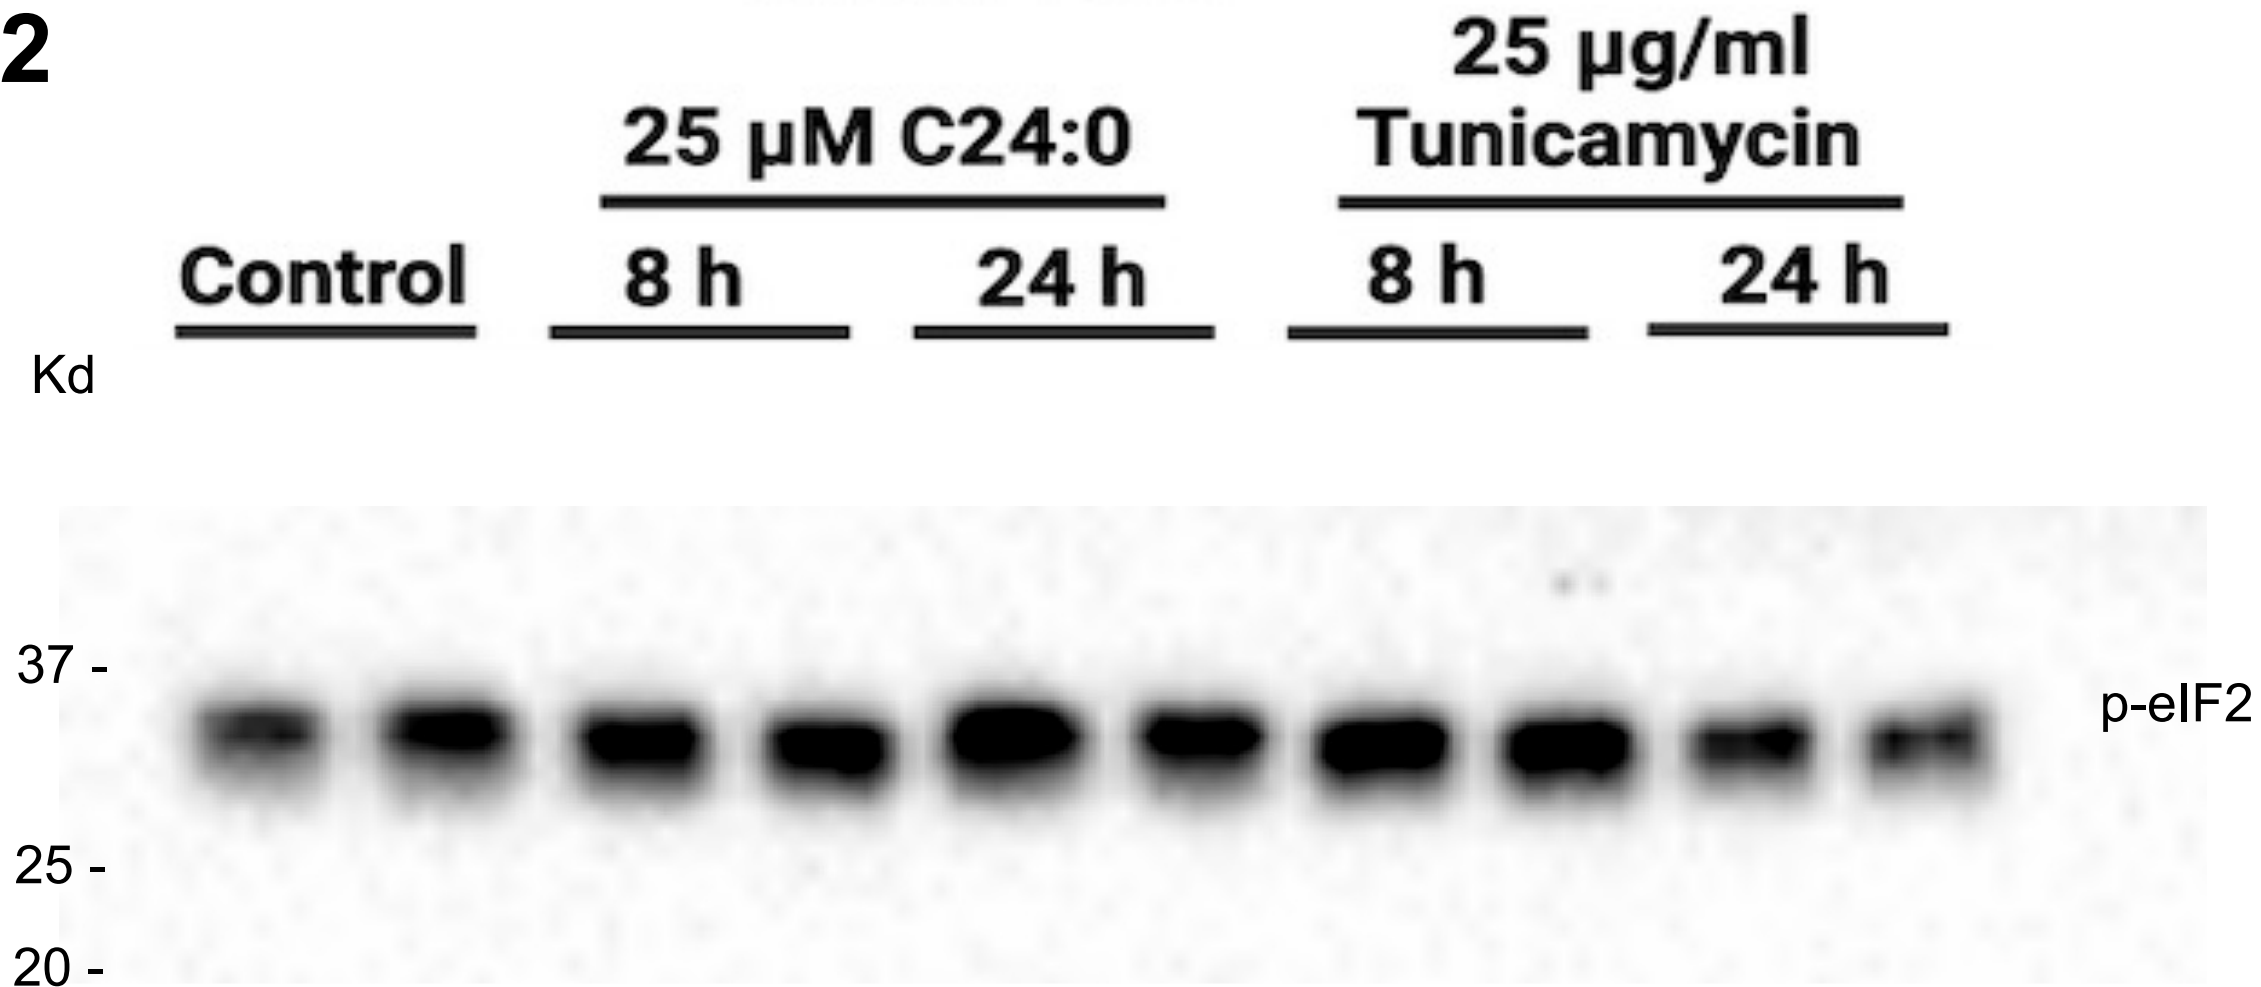

# ATF6

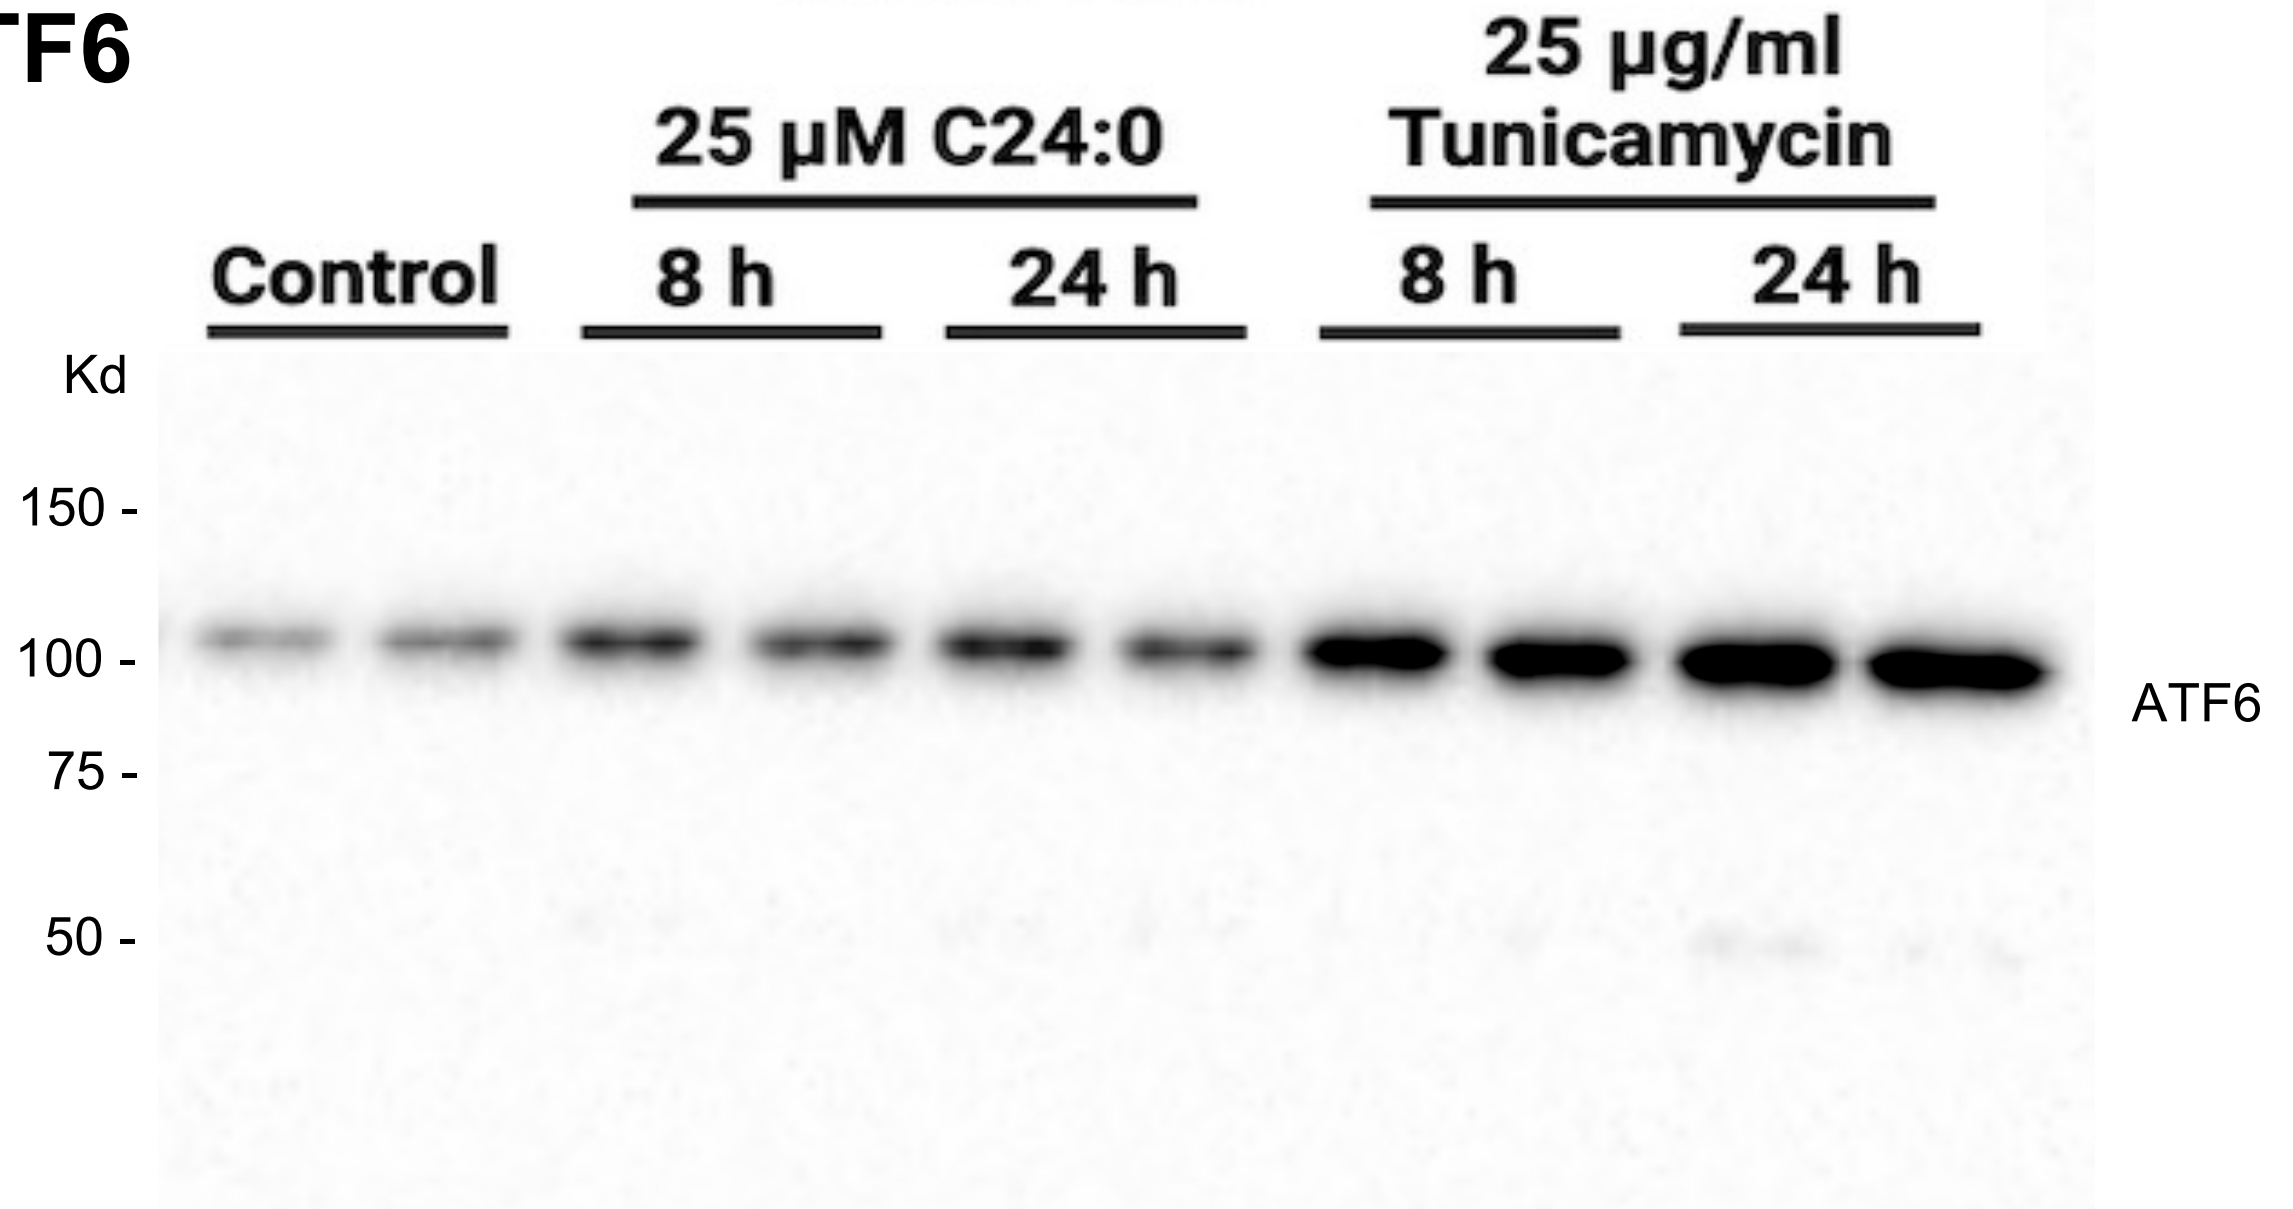

# BIP

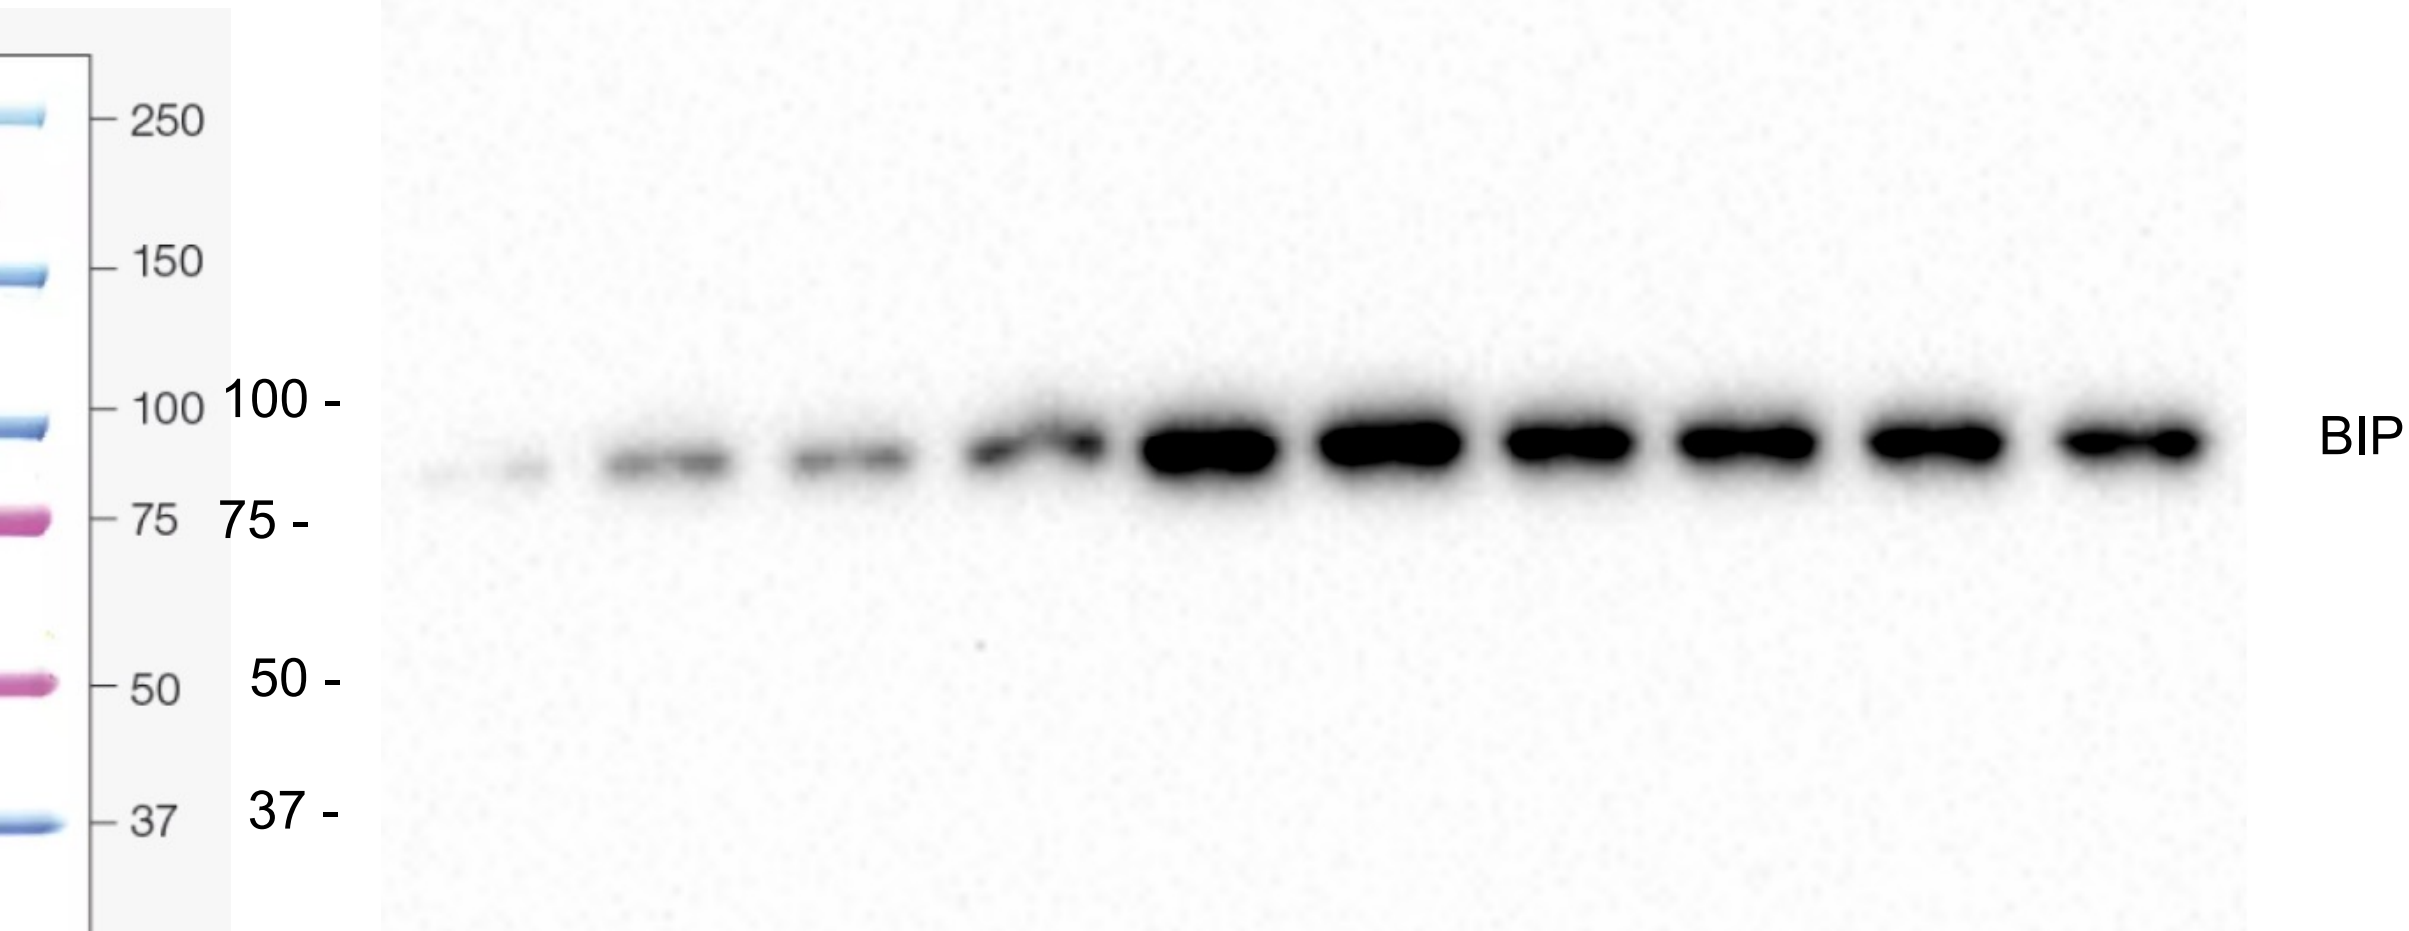

# XBP1

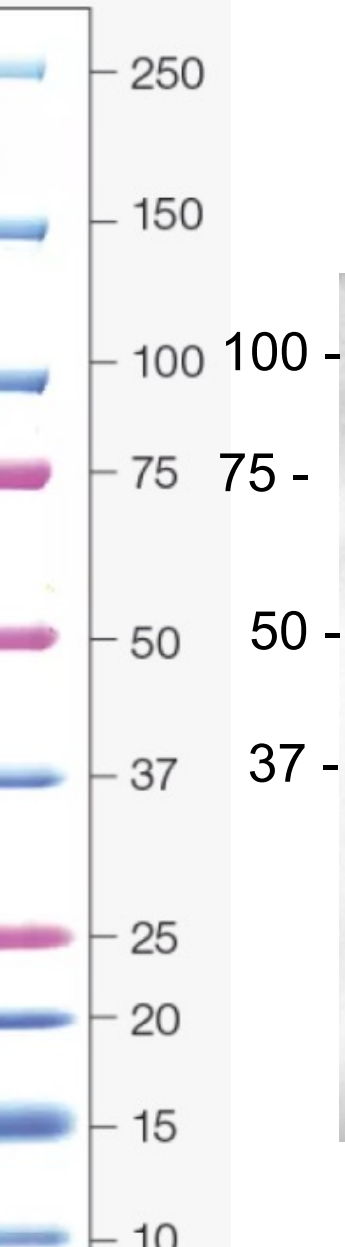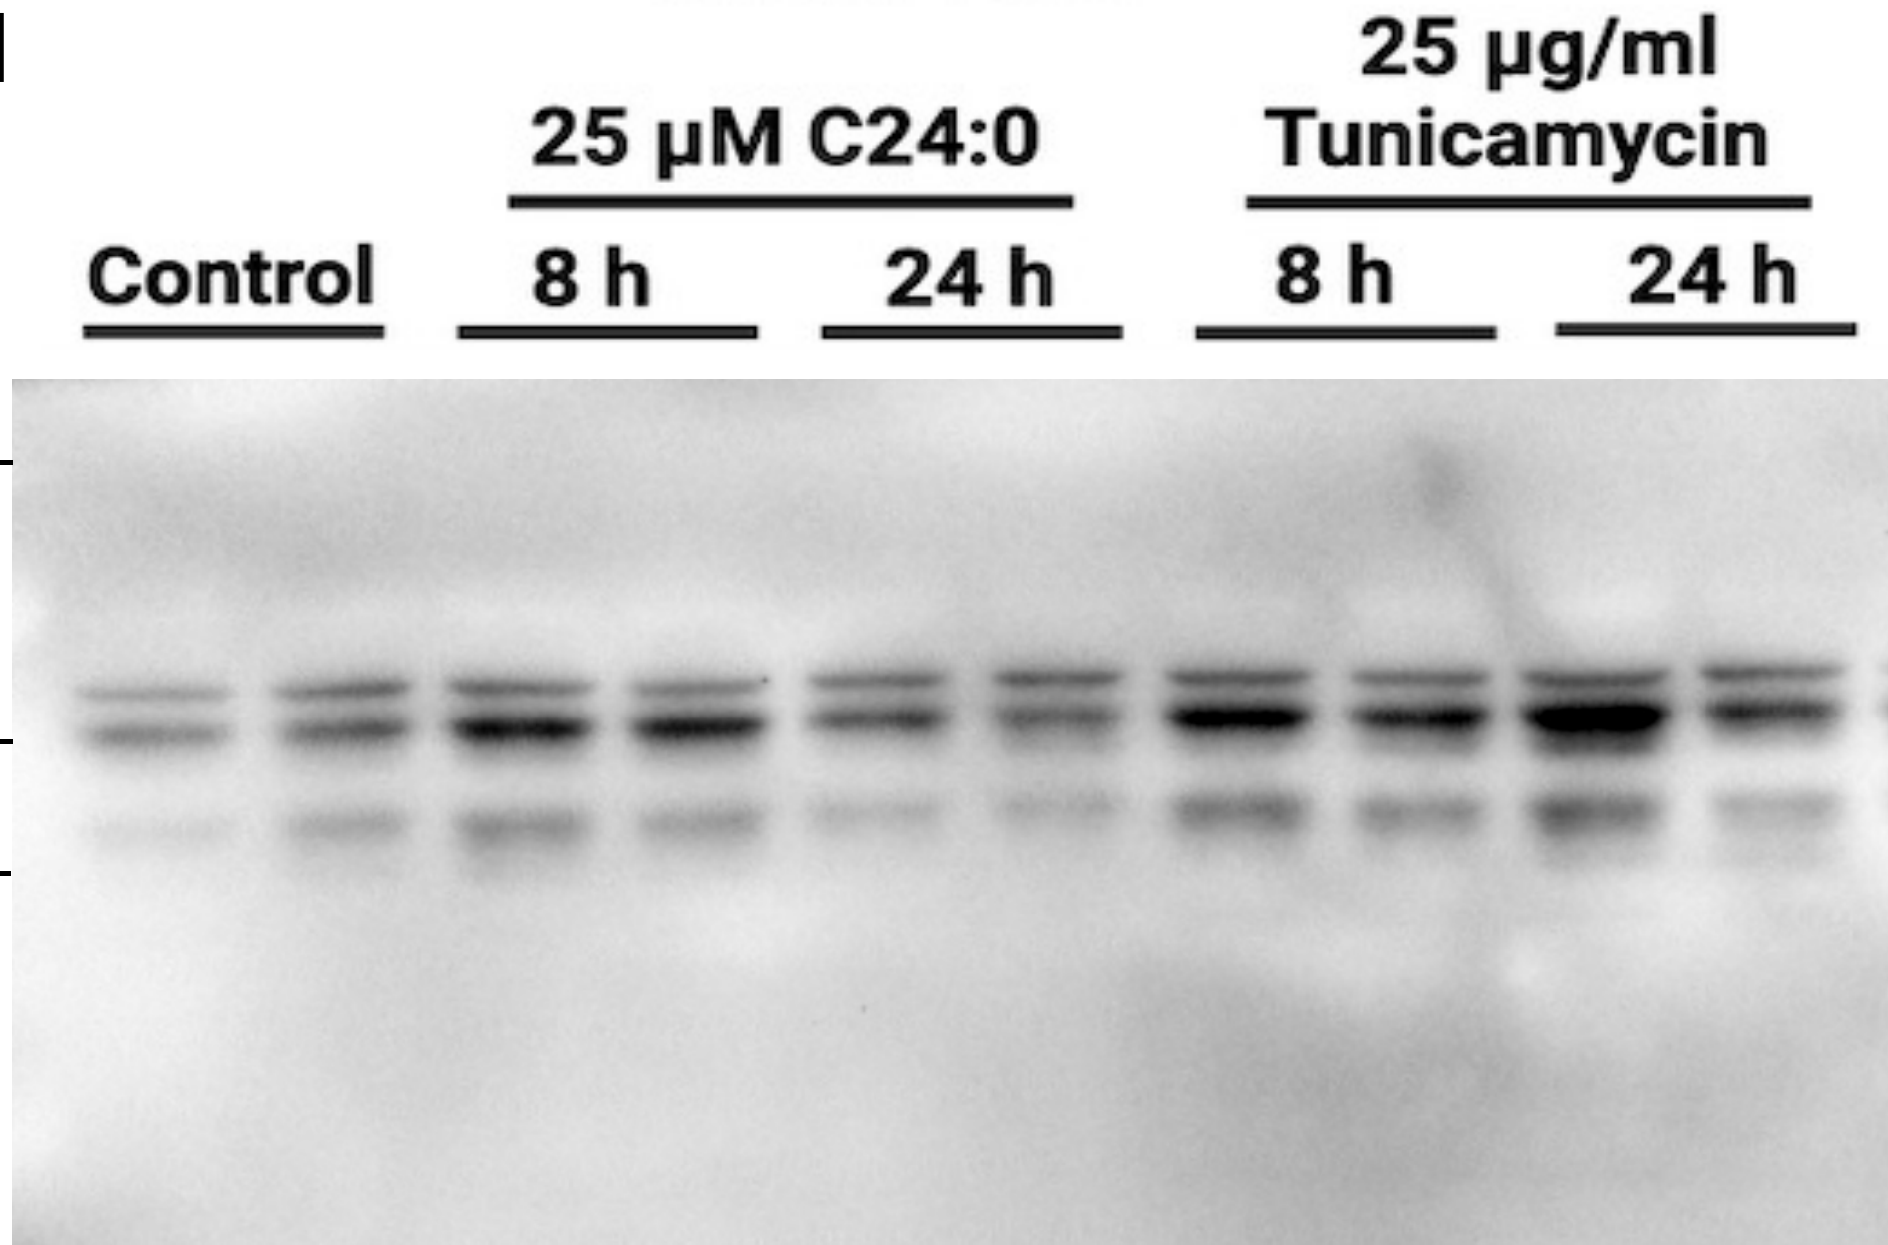

XBP1

# Tubulin

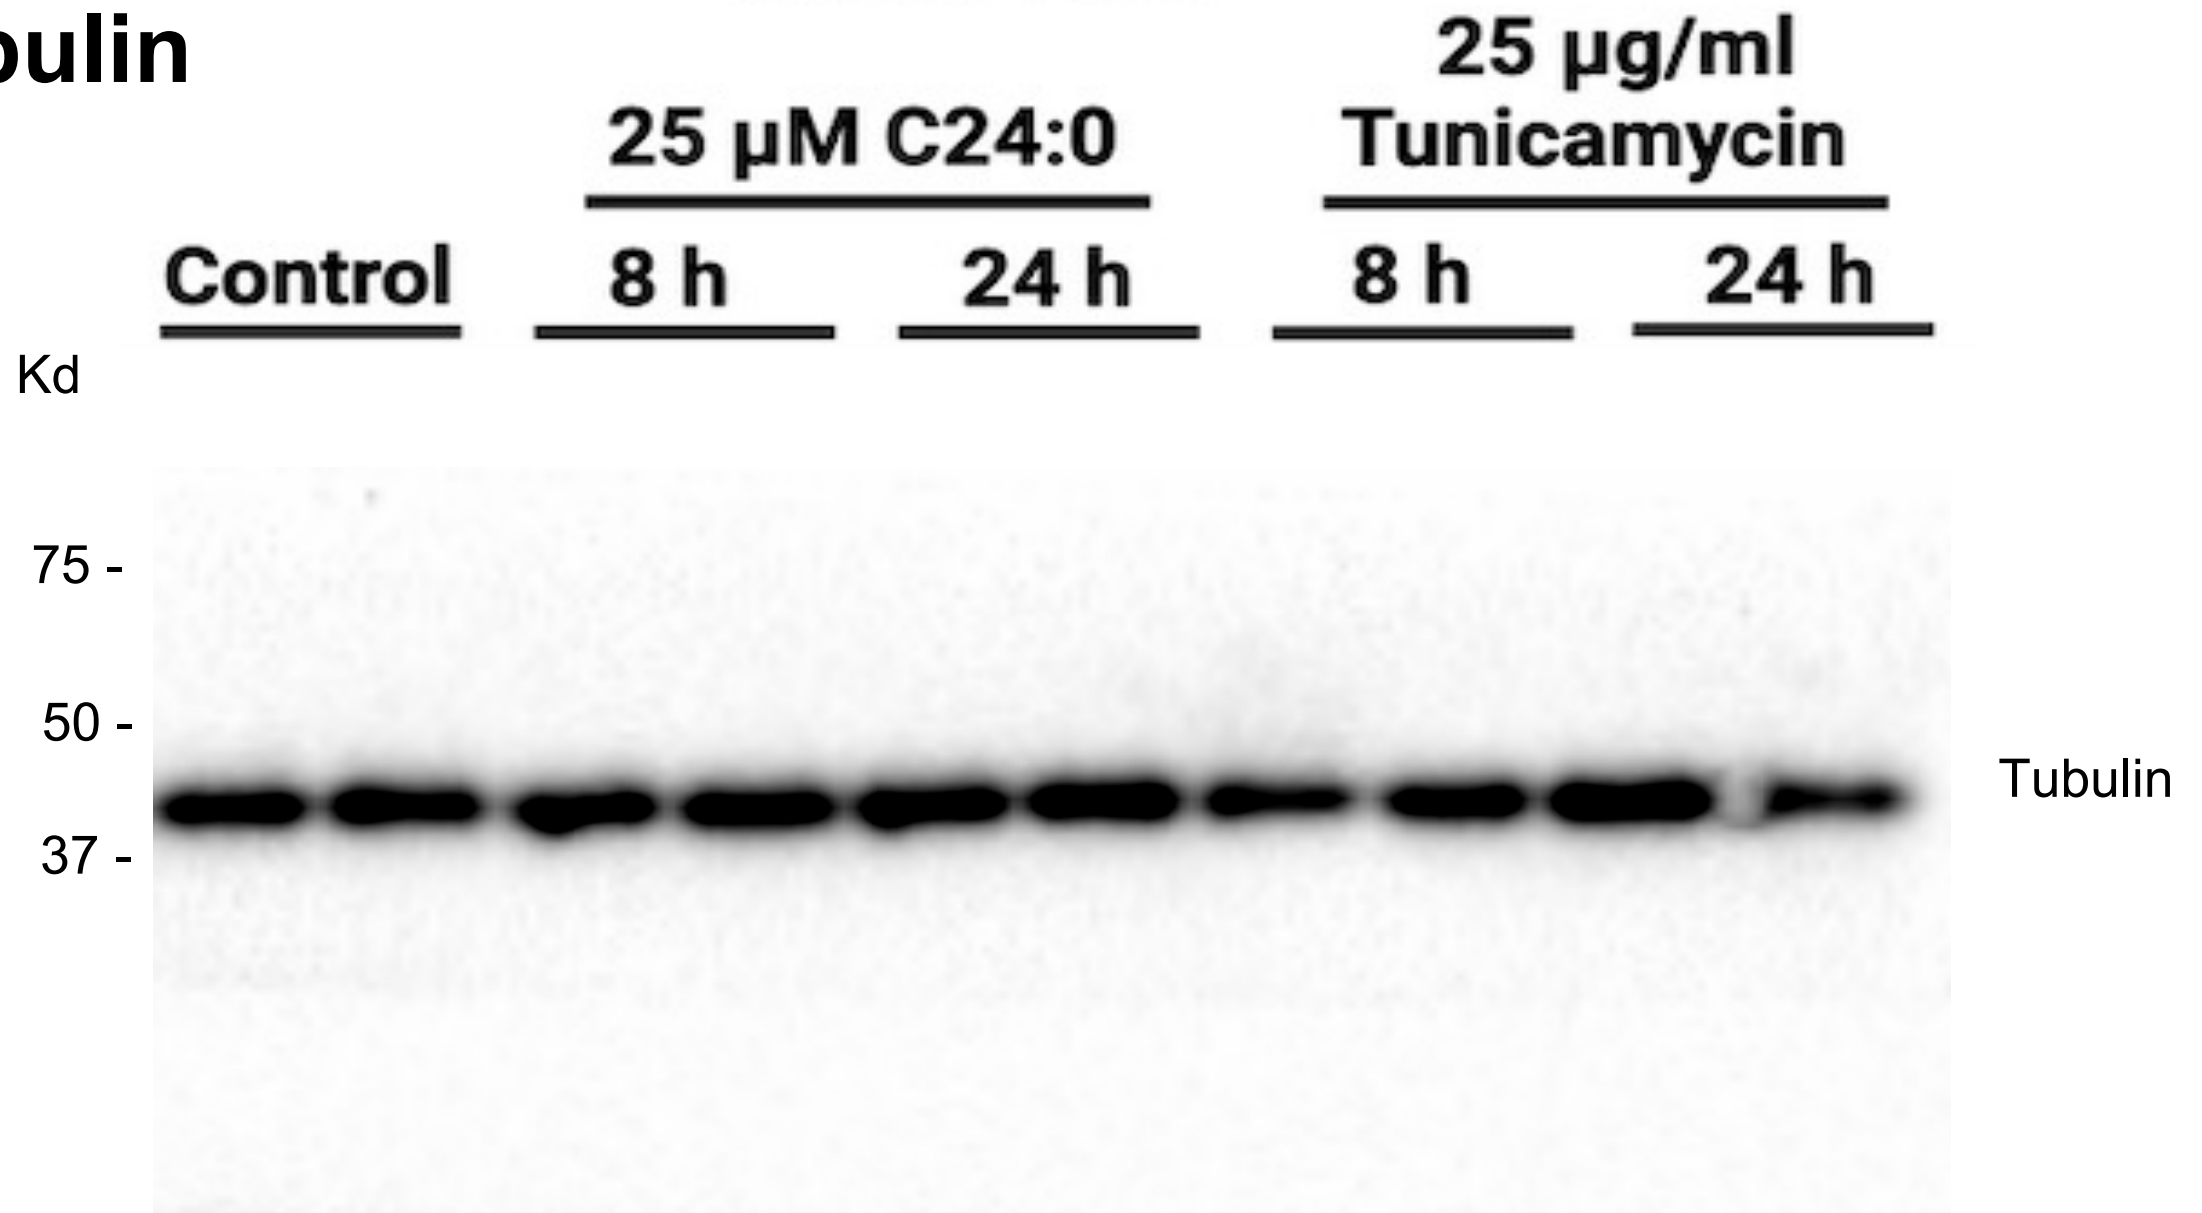

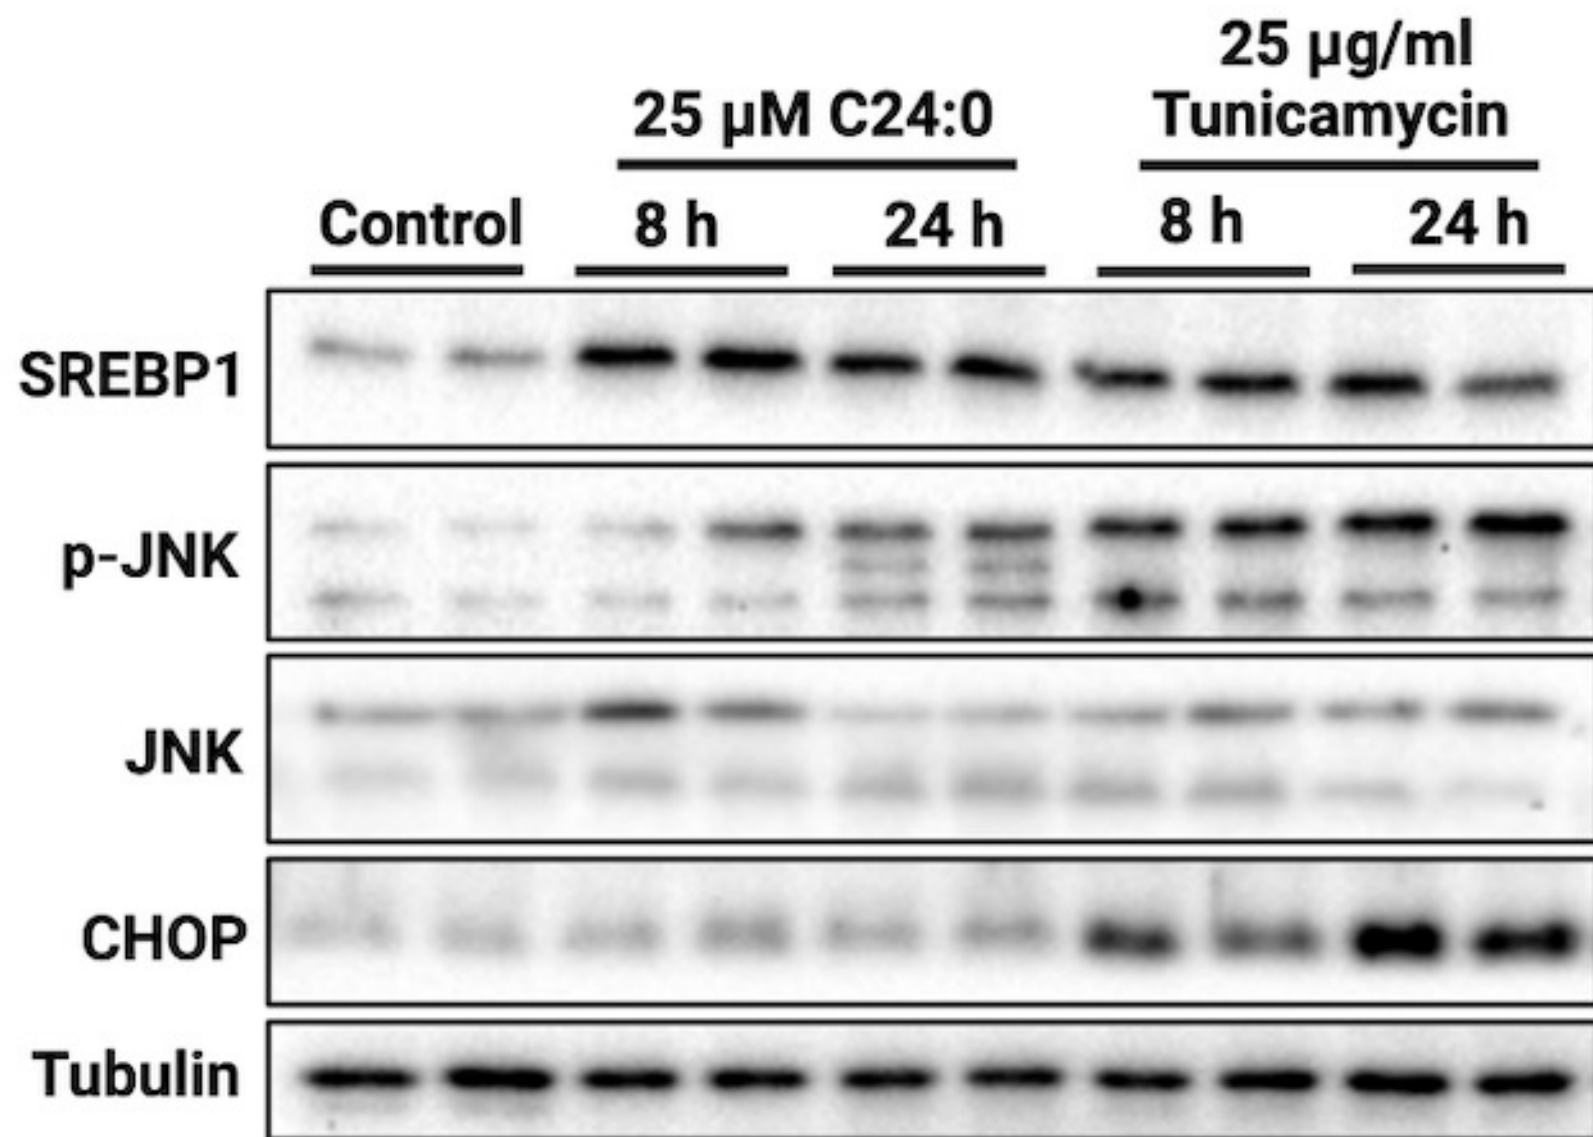



# SREBP1

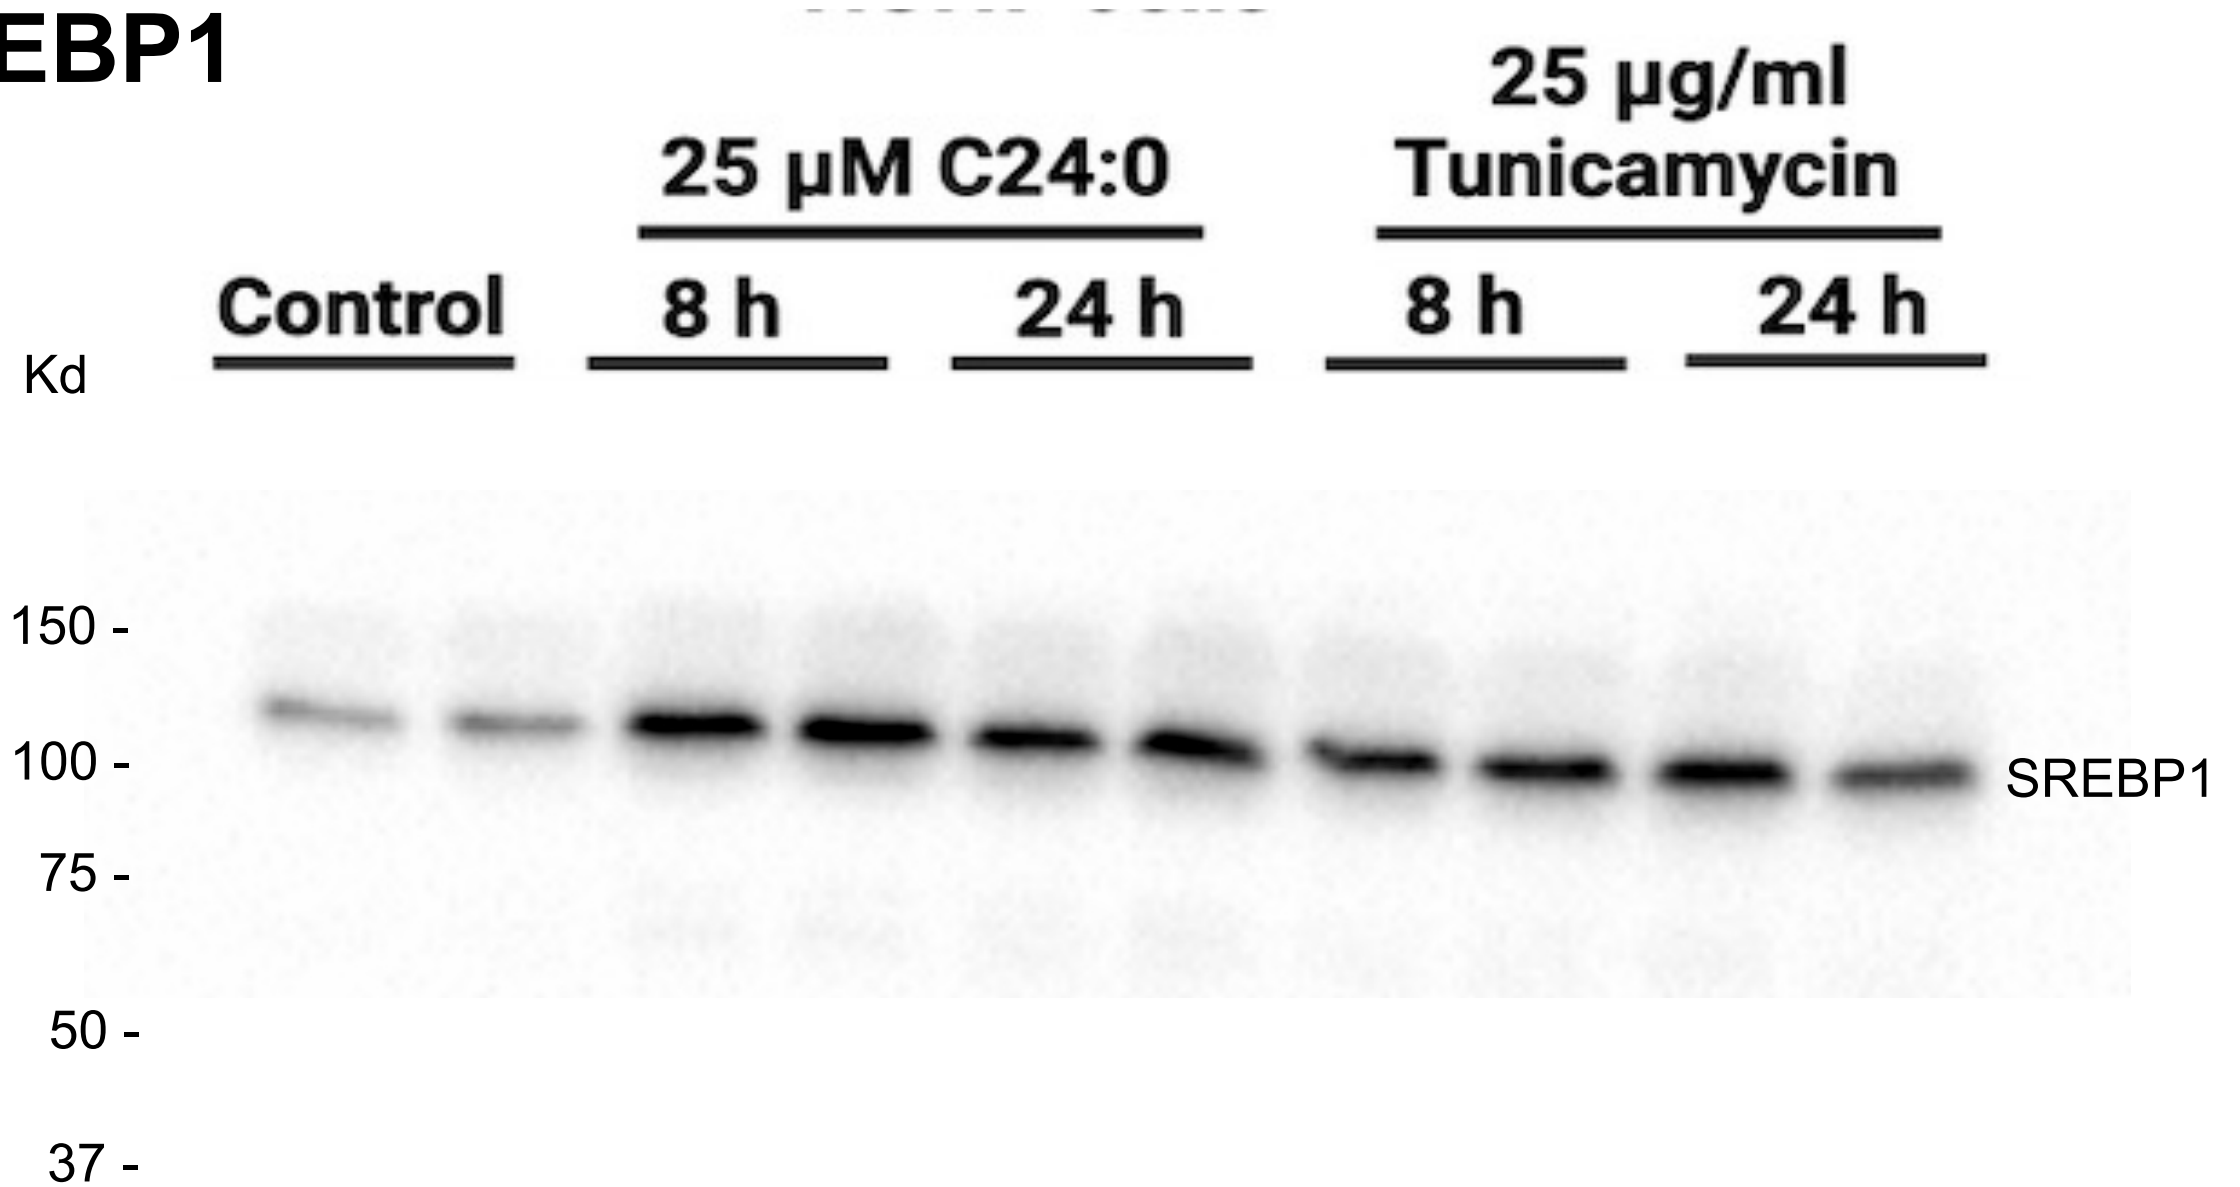

# p-JNK

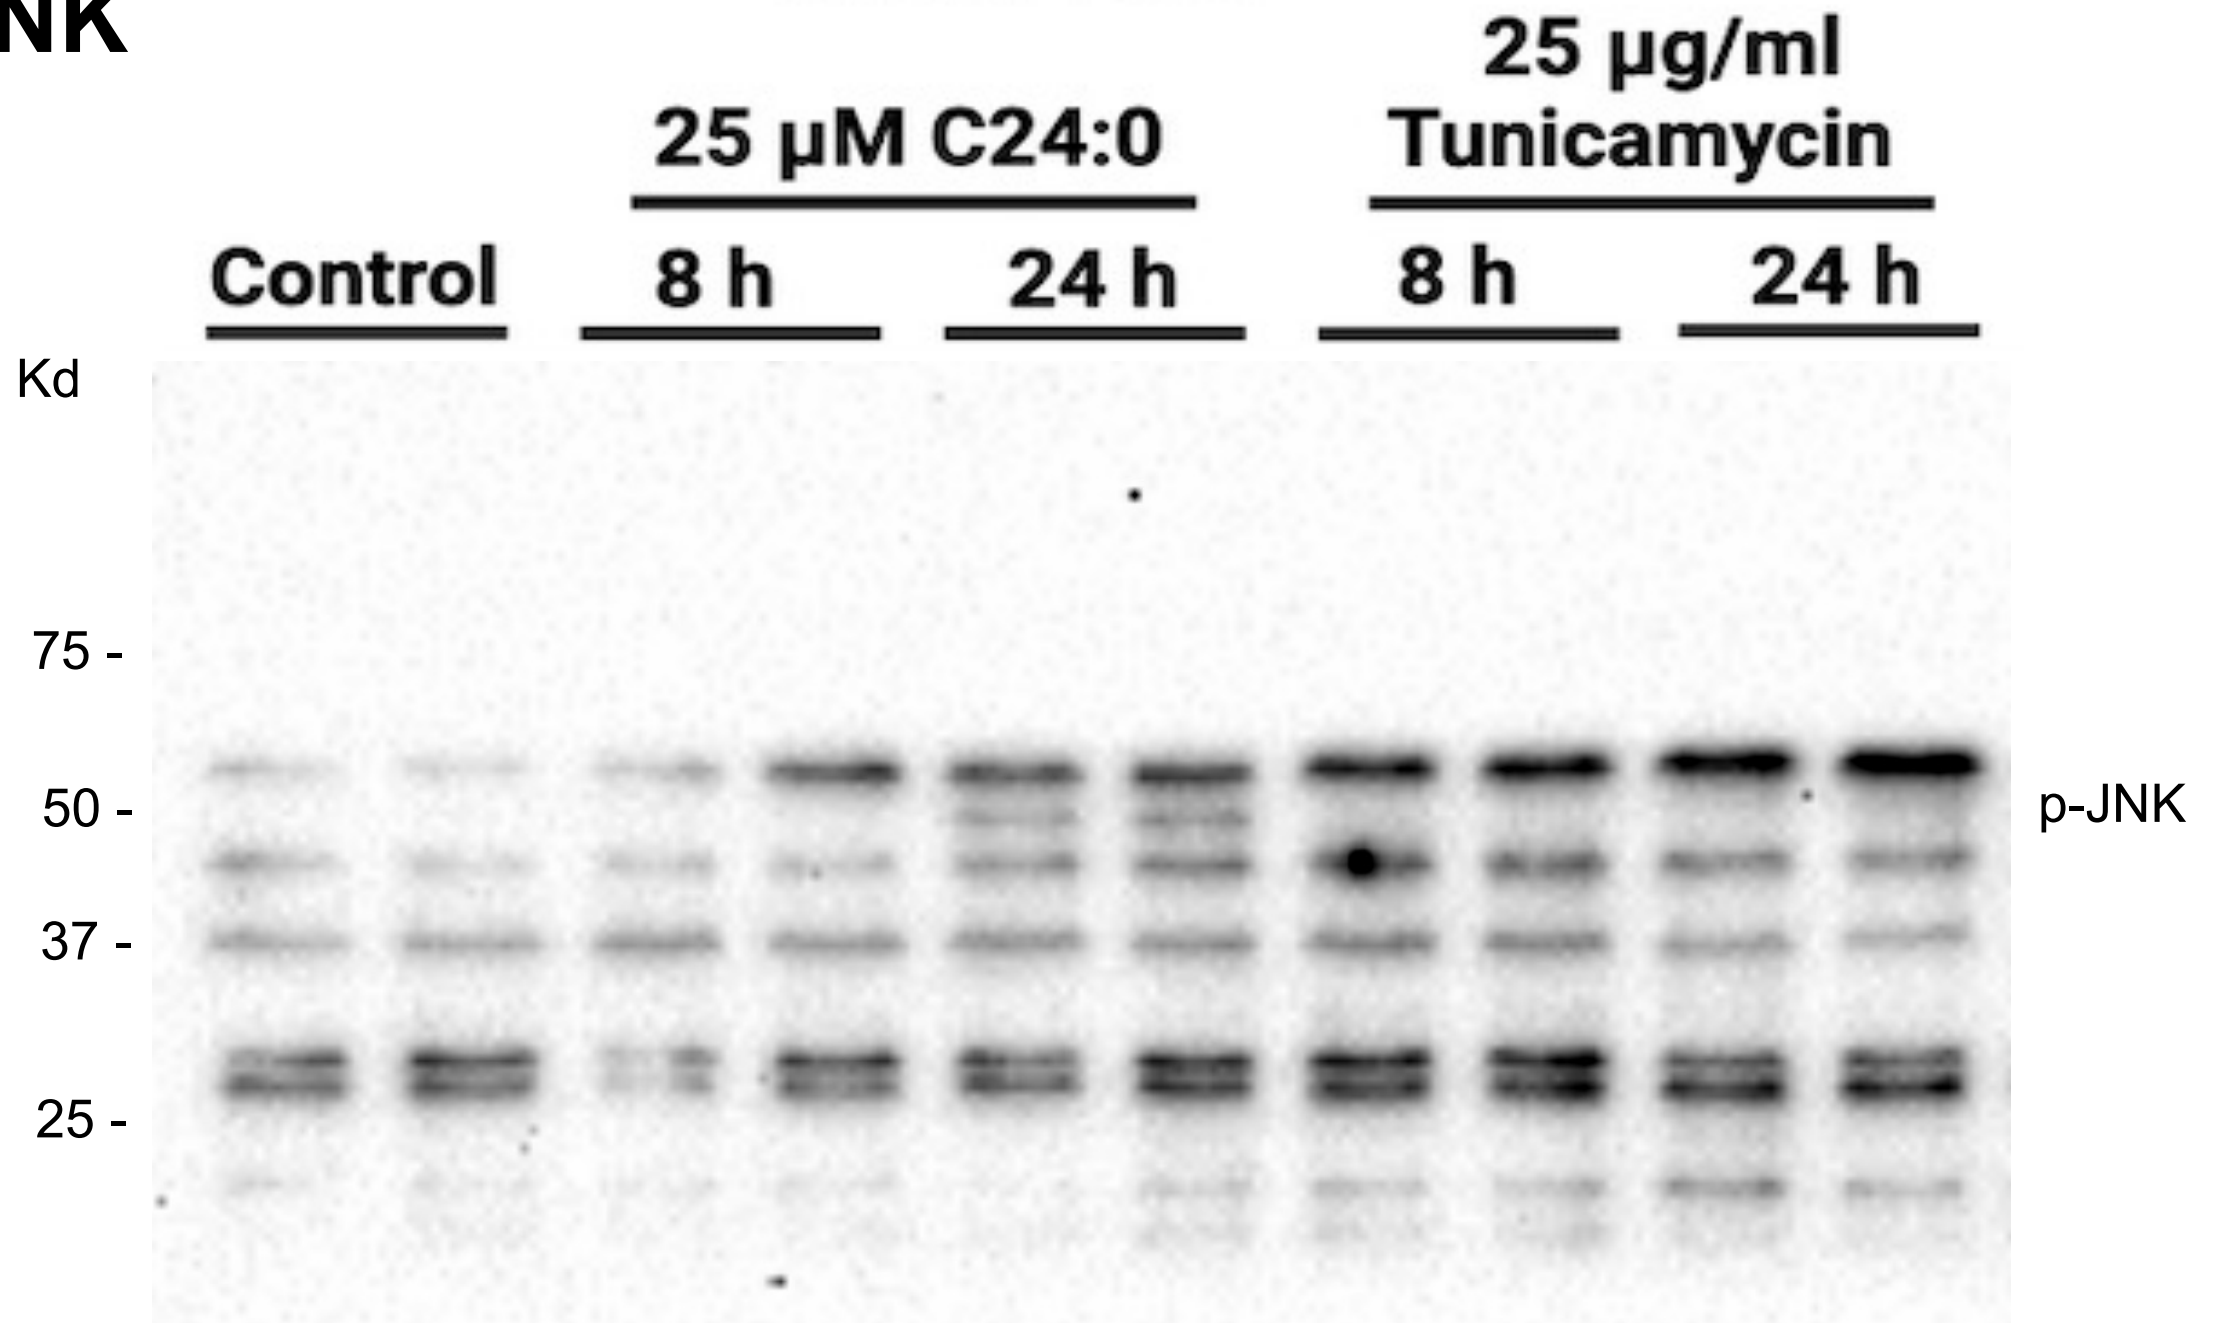

# JNK

**Control**      **25  $\mu$ M C24:0**      **25  $\mu$ g/ml Tunicamycin**  
**8 h**      **24 h**      **8 h**      **24 h**

Kd

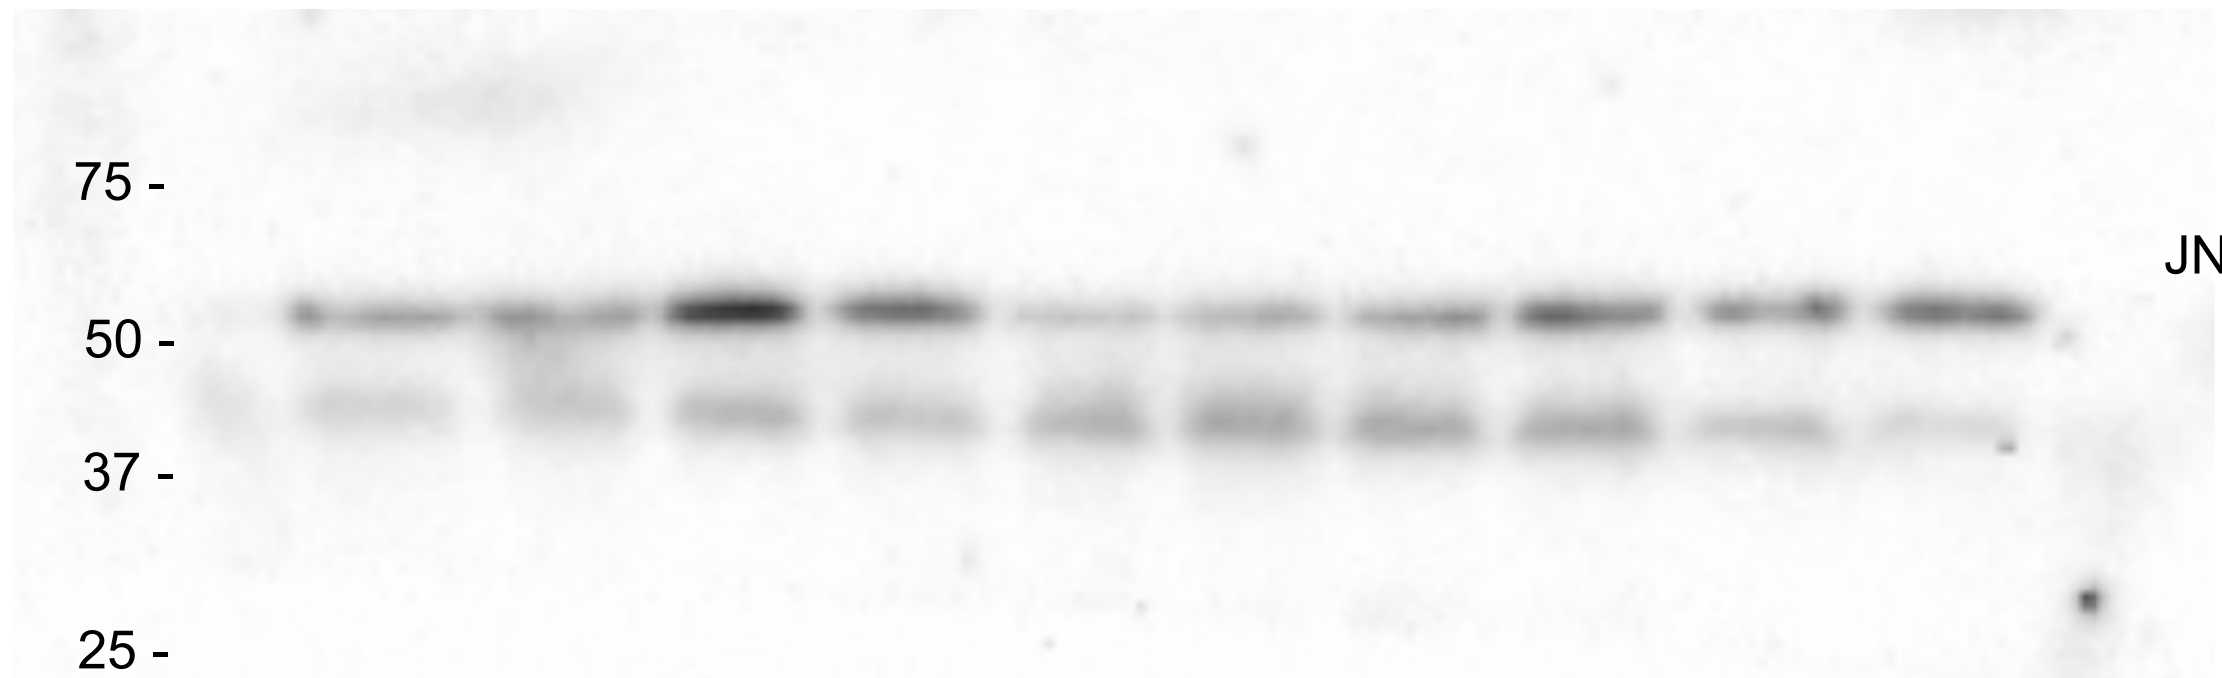

# CHOP

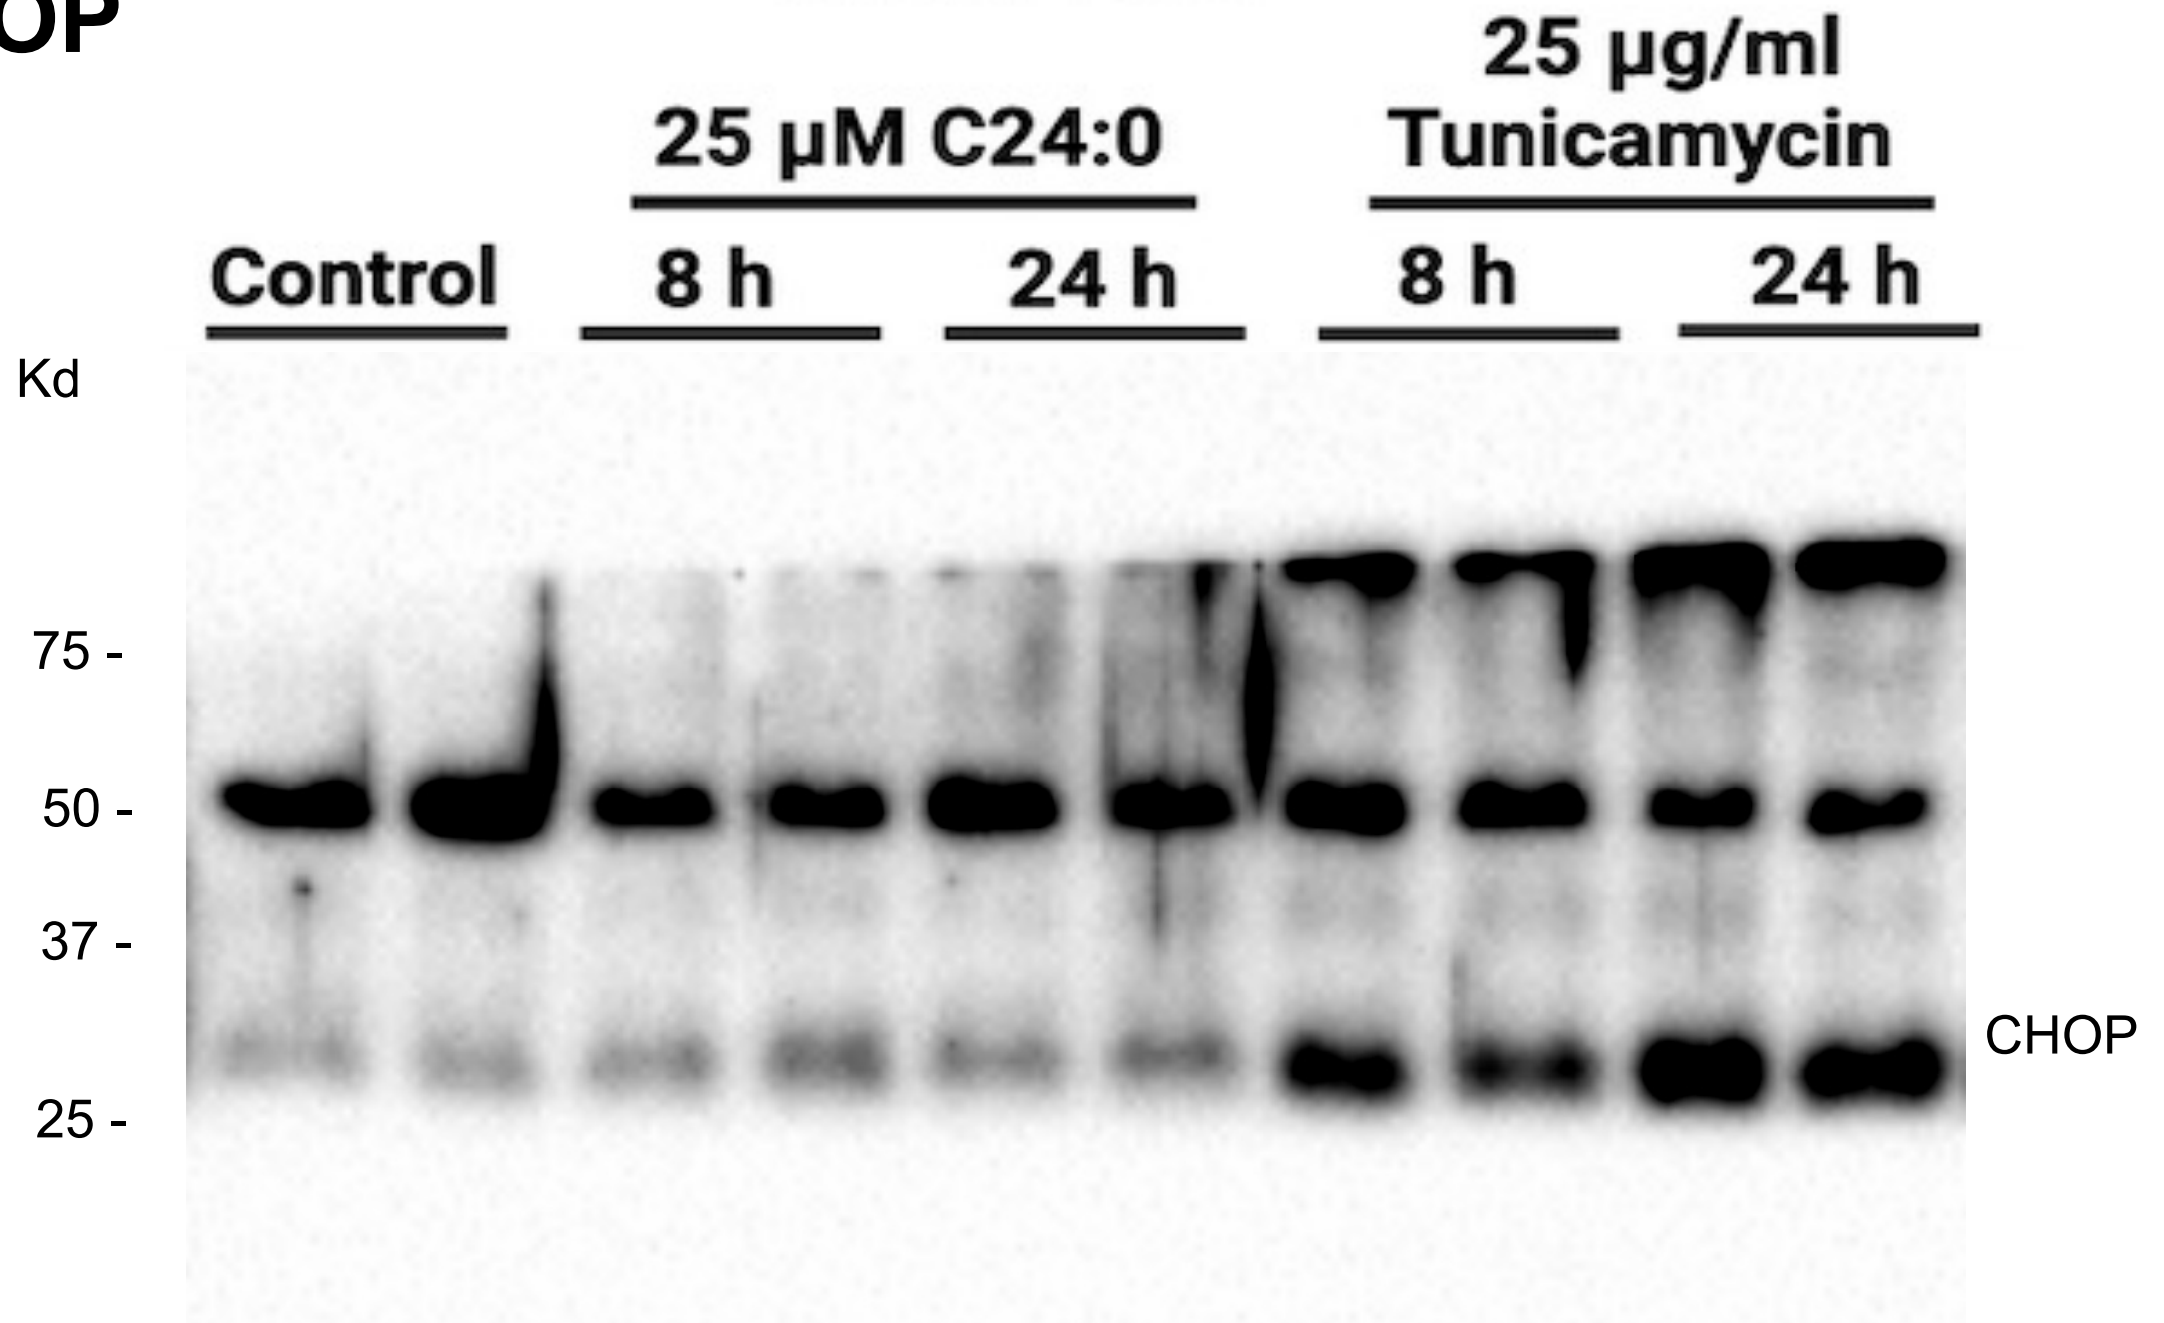

# Tubulin

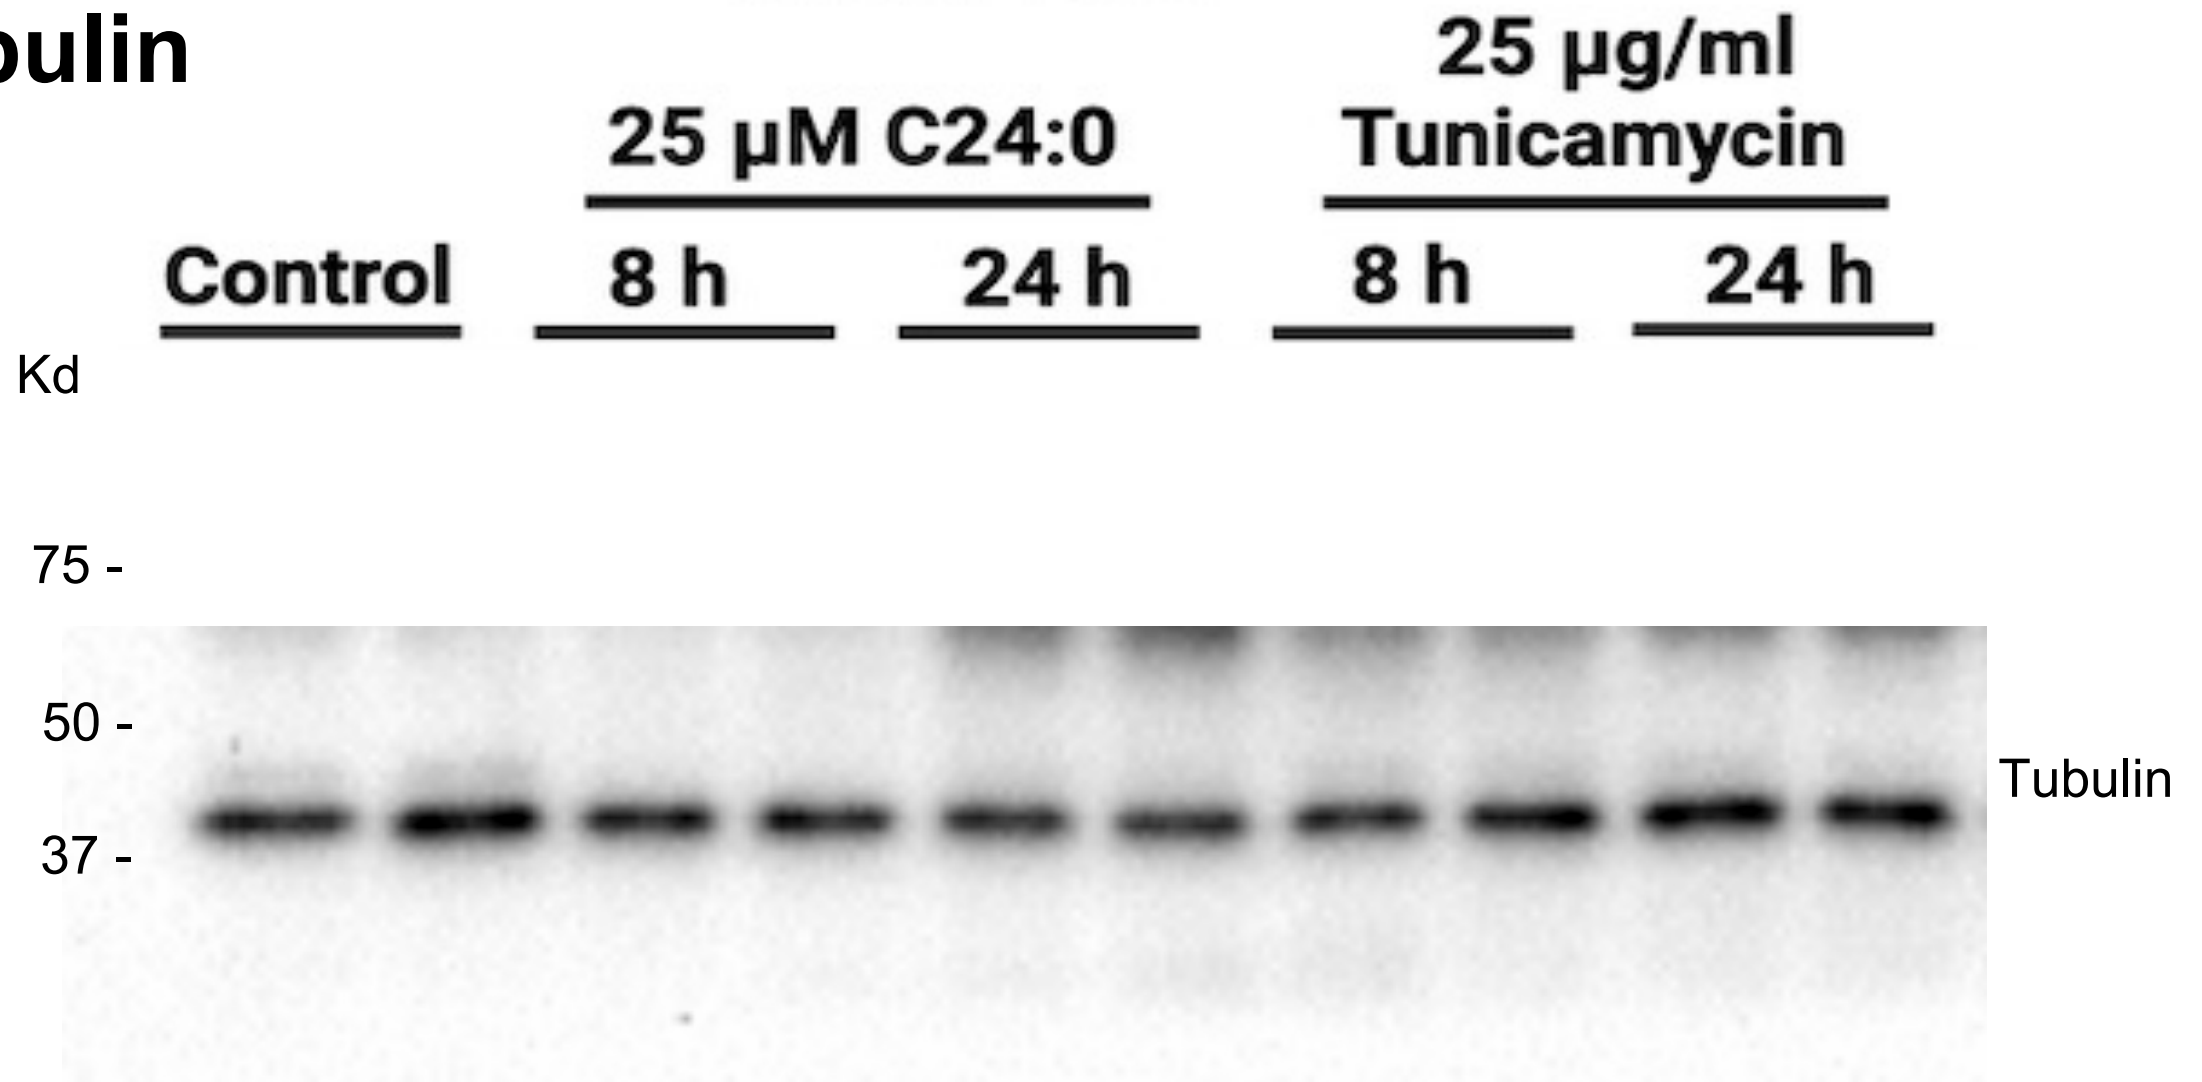

Supplement: mmc1.pdf [file mmc1.pdf]
